# Supplementary material for: Antioxidants and azd0156 Rescue Inflammatory Response in Autophagy-Impaired Macrophages
Source: MDPI journal article supplement (doi:10.3390/ijms25010169), 2023-12-21
Supplement: s1 [file s1]

Supplementary Table S1\_qPCR primers of Human Genes

| Primer Name | Forward Sequence        | Reverse Sequence:        |
|-------------|-------------------------|--------------------------|
| SQSTM1      | TGTGTAGCGTCTGCGAGGGAAA  | AGTGTCCGTGTTTCACCTTCCG   |
| INOS        | GCTCTACACCTCCAATGTGACC  | CTGCCGAGATTTGAGCCTCATG   |
| ARG1        | TCATCTGGGTGGATGCTCACAC  | GAGAATCCTGGCACATCGGGAA   |
| IL1B        | CCACAGACCTTCCAGGAGAATG  | GTGCAGTTCAGTGATCGTACAGG  |
| CXCL2       | GGCAGAAAGCTTGTCTCAACCC  | CTCCTTCAGGAACAGCCACCAA   |
| CXCL3       | TTACCTCAAGAACATCCAAAGTG | TTCTTCCCATTCTTGAGTGTGGC  |
| MT2A        | GAGTGCAAATGCACTTCGTGCAA | GCGTTCTTTACATCTGGGAGCG   |
| VEGFA       | TTGCCTTGCTGCTCTACCTCCA  | GATGGCAGTAGCTGCGCTGATA   |
| SOD2        | CTGGACAAACCTCAGCCCTAAC  | AACCTGAGCCTTGGACACCAAC   |
| IL2         | AGAACTCAAACCTCTGGAGGAAG | GCTGTCTCATCAGCATATTCACAC |
| IL8         | GAGAGTGATTGAGAGTGGACCAC | CACAACCCTCTGCACCCAGTTT   |
| CCL3        | ACTTTGAGACGAGCAGCCAGTG  | TTTCTGGACCCACTCCTCACTG   |
| CCL4        | GCTTCCTCGCAACTTTGTGGTAG | GGTCATACACGTACTCCTGGAC   |
| H3F3A       | ACAAAAGCCGCTCGCAAGAGTG  | TTTCTCGCACCAGACGCTGGAA   |
| THBS1       | GCTGGAAATGTGGTGCTTGTCC  | CTCCATTGTGGTTGAAGCAGGC   |
| ATM         | TGTTCCAGGACACGAAGGGAGA  | CAGGGTTCTCAGCACTATGGGA   |
| ATR         | GGAGATTTCTGAGCATGTTCGG  | GGCTTCTTTACTCCAGACCAATC  |
| H2AX        | CGGCAGTGCTGGAGTACCTCA   | AGTCCTCGTCGTTGCGGATG     |
| RAD23       | GCGTTACTACAGCAGATAGGTG  | CAGCTTCTGCAATTCCTCCACTG  |
| RAD50       | GGAAGAGCAGTTGTCCAGTTACG | GAGTAAACTGCTGTGGCTCCAG   |
| UNG         | CCACACCAAGTCTTCACCTGGA  | CCGTGAGCTTGATTAGGTCCATG  |
| DDB1        | CATTCTCGCTCCATCCTGATG   | CCTTCTTACGGTCGCTCAACAG   |
| ACTB        | CACCATTGGCAATGAGCGGTTC  | AGGTCTTTGCGGATGTCCACGT   |
| GADPH       | GTCTCCTCTGACTTCAACAGCG  | ACCACCCTGTTGCTGTAGCCAA   |

Supplementary Table S2\_qPCR primers of Mouse genes

| Primer Name | Forward Sequence        | Reverse Sequence:       |
|-------------|-------------------------|-------------------------|
| Cd45        | CTTCAGTGGTCCCATTGTGGTG  | TCAGACACCTCTGTGCGCCTTAG |
| Mmp2        | CAAGGATGGACTCCTGGCACAT  | TACTCGCCATCAGCGTTCCCAT  |
| Mmp9        | GCTGACTACGATAAGGACGGCA  | TAGTGGTGCAGGCAGAGTAGGA  |
| Cxcl2       | CATCCAGAGCTTGAGTGTGACG  | GGCTTCAGGGTCAAGGCAAAC   |
| Ccl4        | ACCCTCCCACCTTCCTGCTGTTT | CTGTCTGCCTCTTTTGGTCAGG  |
| Thbs1       | GGTAGCTGGAAATGTGGTGCGT  | GCACCGATGTTCTCCGTTGTGA  |
| Ung         | ATGGACCCAGATGTGCGACATC  | CTGGTCTTTGGACACTGAAGCAG |
| Ddb1        | GTAGCCACTACCTCCTTTGTGC  | GAGAACGGAATGTCCTCAACACC |
| Actb        | CATTGCTGACAGGATGCAGAAGG | TGCTGGAAGGTGGACAGTGAGG  |
| Gadph       | CATCACTGCCACCCAGAAGACTG | ATGCCAGTGAGCTTCCCGTTCAG |
